# Supplementary material for: Genome-Wide Analysis of Selection on the Malaria Parasite Plasmodium falciparum in West African Populations of Differing Infection Endemicity
Source: PubMed Central journal article supplement (PMC4032133; doi:10.1093/molbev/msu106), 2014-03-18
Supplement: supp_msu106_Supplementary_Tables_S1-S2_S4-S7.pdf [file supp_msu106_Supplementary_Tables_S1-S2_S4-S7.pdf]

**Supplementary Table S1.** Isolate sequence read coverage and ENA reference numbers. <sup>a</sup>  
European Nucleotide Archive ID

| Study ID             | Sample Code | ENA ID <sup>a</sup> | Mean coverage<br>(genome wide) |
|----------------------|-------------|---------------------|--------------------------------|
| ZUC007               | PA0245-C    | ERS041967           | 99.1                           |
| ZUG116               | PA0237-C    | ERS042100           | 164.7                          |
| ZUG118               | PA0152-C    | ERS042063           | 27.9                           |
| ZRB072               | PA0155-C    | ERS042000           | 44.7                           |
| ZRB073               | PA0231-C    | ERS041991           | 45.8                           |
| ZRB078               | PA0137-C    | ERS042009           | 39.5                           |
| ZRB079               | PA0148-C    | ERS042054           | 128.6                          |
| ZRB242               | PA0193-C    | ERS042055           | 89.7                           |
| ZRB245               | PA0190-C    | ERS041981           | 24.5                           |
| ZRB613               | PA0185-C    | ERS042046           | 45.9                           |
| ZRB 615              | PA0146-C    | ERS041979           | 29.2                           |
| ZRB618               | PA0215-C    | ERS042069           | 34.8                           |
| ZRB619               | PA0200-C    | ERS042097           | 100.5                          |
| ZRB622               | PA0216-C    | ERS042102           | 159.0                          |
| ZRG313               | PA0251-C    | ERS042101           | 26.9                           |
| ZRG316               | PA0138-C    | ERS041976           | 83.9                           |
| ZRG323               | PA0160-C    | ERS042087           | 51.7                           |
| ZRG330               | PA0253-C    | ERS041978           | 24.4                           |
| ZRG349               | PA0180-C    | ERS041983           | 44.7                           |
| ZRG364               | PA0179-C    | ERS042089           | 75.4                           |
| ZRG365               | PA0256-C    | ERS042082           | 119.8                          |
| ZRG377               | PA0163-C    | ERS042065           | 33.6                           |
| ZRK276               | PA0188-C    | ERS042029           | 28.8                           |
| ZRK277               | PA0182-C    | ERS042073           | 20.3                           |
| ZRK282               | PA0176-C    | ERS042031           | 40.7                           |
| ZRL191               | PA0227-C    | ERS042075           | 105.8                          |
| ZRL205               | PA0270-C    | ERS042044           | 39.1                           |
| ZRL210               | PA0263-C    | ERS042084           | 45.2                           |
| ZRL211               | PA0269-C    | ERS042052           | 33.4                           |
| ZRL213               | PA0267-C    | ERS042013           | 16.0                           |
| ZRN <sub>s</sub> 122 | PA0232-C    | ERS042028           | 35.4                           |
| ZRN <sub>s</sub> 124 | PA0243-C    | ERS042012           | 27.0                           |
| ZRN <sub>s</sub> 129 | PA0249-C    | ERS042036           | 36.7                           |
| ZRN <sub>s</sub> 132 | PA0239-C    | ERS041993           | 40.9                           |
| ZRN <sub>s</sub> 141 | PA0134-C    | ERS041972           | 112.4                          |
| ZRN <sub>s</sub> 144 | PA0233-C    | ERS041994           | 41.5                           |
| ZRSa634              | PA0261-C    | ERS042066           | 18.3                           |
| ZRS042               | PA0169-C    | ERS042040           | 58.5                           |
| ZRS050               | PA0153-C    | ERS042074           | 141.8                          |
| ZRS066               | PA0246-C    | ERS041998           | 29.0                           |
| ZRS068               | PA0222-C    | ERS041992           | 39.8                           |
| ZRS715               | PA0151-C    | ERS042004           | 38.4                           |

|         |          |           |       |
|---------|----------|-----------|-------|
| ZRS719  | PA0225-C | ERS042045 | 44.4  |
| ZRS736  | PA0262-C | ERS042026 | 64.4  |
| ZRSk161 | PA0147-C | ERS042039 | 37.9  |
| ZRSk162 | PA0228-C | ERS041997 | 28.4  |
| ZRSk184 | PA0230-C | ERS042107 | 137.5 |
| ZRSk185 | PA0229-C | ERS042093 | 66.8  |
| ZRSk744 | PA0224-C | ERS042049 | 81.6  |
| ZRY020  | PA0184-C | ERS042010 | 38.6  |
| ZRY027  | PA0198-C | ERS041987 | 38.7  |
| ZRY031  | PA0255-C | ERS042003 | 14.6  |
| ZRY033  | PA0223-C | ERS042006 | 43.2  |
| ZRY042  | PA0234-C | ERS042106 | 60.4  |
| ZRY298  | PA0257-C | ERS042078 | 34.0  |
| ZRY302  | PA0178-C | ERS042090 | 117.7 |
| ZRY304  | PA0254-C | ERS041989 | 38.7  |
| ZRY649  | PA0210-C | ERS042111 | 113.8 |
| ZRY657  | PA0260-C | ERS042043 | 42.9  |
| ZRY669  | PA0214-C | ERS042002 | 29.2  |
| ZUM378  | PA0172-C | ERS041968 | 124.3 |
| ZUM382  | PA0165-C | ERS042079 | 147.6 |
| ZUM390  | PA0140-C | ERS041990 | 15.4  |
| ZUM445  | PA0149-C | ERS042067 | 19.8  |
| ZUM448  | PA0195-C | ERS042034 | 62.0  |
| ZUM695  | PA0221-C | ERS042071 | 76.5  |
| ZUD403  | PA0219-C | ERS042048 | 70.1  |
| ZUD404  | PA0197-C | ERS042032 | 44.7  |
| ZUD414  | PA0191-C | ERS042109 | 75.6  |
| ZUD427  | PA0189-C | ERS042112 | 128.0 |
| ZUD428  | PA0220-C | ERS041999 | 29.6  |
| ZUD451  | PA0183-C | ERS042062 | 35.3  |
| ZUD458  | PA0159-C | ERS042083 | 138.8 |
| ZUD459  | PA0187-C | ERS042104 | 151.3 |
| ZUD464  | PA0144-C | ERS042041 | 38.2  |
| ZUD465  | PA0168-C | ERS042038 | 79.8  |
| ZUD468  | PA0161-C | ERS041970 | 94.7  |
| ZUD475  | PA0157-C | ERS041975 | 41.4  |
| ZUD478  | PA0158-C | ERS042033 | 47.0  |
| ZUD482  | PA0171-C | ERS042001 | 52.6  |
| ZUD488  | PA0173-C | ERS042077 | 143.6 |
| ZUD498  | PA0167-C | ERS042108 | 128.5 |
| ZUD499  | PA0186-C | ERS042050 | 148.0 |
| ZUD500  | PA0145-C | ERS041974 | 132.0 |
| ZUD501  | PA0177-C | ERS042085 | 158.3 |
| ZUD521  | PA0208-C | ERS042088 | 140.2 |
| ZUD534  | PA0203-C | ERS041988 | 56.1  |
| ZUD546  | PA0209-C | ERS042099 | 160.8 |

|         |          |           |       |
|---------|----------|-----------|-------|
| ZUD548  | PA0204-C | ERS042042 | 64.0  |
| ZUD549  | PA0201-C | ERS041986 | 42.6  |
| ZUD566  | PA0207-C | ERS042098 | 111.0 |
| ZUD570  | PA0217-C | ERS042070 | 72.4  |
| ZUD573  | PA0212-C | ERS042113 | 110.3 |
| ZUD579  | PA0211-C | ERS042110 | 149.6 |
| ZUD581  | PA0213-C | ERS042091 | 126.2 |
| ZUD584  | PA0206-C | ERS042056 | 133.0 |
| ZUD585  | PA0218-C | ERS042027 | 42.3  |
| ZUH612  | PA0205-C | ERS042105 | 76.8  |
| ZUDk512 | PA0199-C | ERS042086 | 128.1 |
| ZUDk517 | PA0202-C | ERS042057 | 124.7 |

---

**Supplementary Table S2.**  $F_{ws}$  scores for individual samples. Bold, samples where a single genotype dominated the infection ( $F_{ws} > 0.95$ ). NA, this sample did not pass the quality controls for the  $F_{ws}$  analysis.

| Population | Sample code     | $F_{ws}$    |
|------------|-----------------|-------------|
| Gambia     | PA0008-C        | 0.38        |
|            | <b>PA0011-C</b> | <b>0.98</b> |
|            | <b>PA0012-C</b> | <b>0.96</b> |
|            | <b>PA0016-C</b> | <b>0.97</b> |
|            | <b>PA0017-C</b> | <b>0.98</b> |
|            | PA0018-C        | NA          |
|            | <b>PA0020-C</b> | <b>0.97</b> |
|            | PA0021-C        | 0.55        |
|            | <b>PA0022-C</b> | <b>0.97</b> |
|            | PA0027-C        | 0.70        |
|            | <b>PA0029-C</b> | <b>0.96</b> |
|            | PA0030-C        | 0.30        |
|            | <b>PA0032-C</b> | <b>0.96</b> |
|            | <b>PA0034-C</b> | <b>0.96</b> |
|            | <b>PA0035-C</b> | <b>0.96</b> |
|            | <b>PA0036-C</b> | <b>0.96</b> |
|            | <b>PA0037-C</b> | <b>0.96</b> |
|            | <b>PA0038-C</b> | <b>0.97</b> |
|            | PA0039-C        | 0.80        |
|            | PA0040-C        | 0.83        |
|            | PA0041-C        | 0.81        |
|            | <b>PA0042-C</b> | <b>0.97</b> |
|            | PA0044-C        | 0.90        |
|            | <b>PA0045-C</b> | <b>0.97</b> |
|            | <b>PA0049-C</b> | <b>0.96</b> |
|            | <b>PA0050-C</b> | <b>0.95</b> |
|            | PA0052-C        | 0.57        |
|            | PA0053-C        | 0.60        |
|            | <b>PA0057-C</b> | <b>0.95</b> |
|            | <b>PA0060-C</b> | <b>0.98</b> |
|            | PA0061-C        | 0.52        |
|            | <b>PA0065-C</b> | <b>0.97</b> |
|            | <b>PA0066-C</b> | <b>0.97</b> |
|            | <b>PA0067-C</b> | <b>0.98</b> |
|            | PA0068-C        | 0.92        |
|            | PA0069-C        | 0.88        |
|            | <b>PA0071-C</b> | <b>0.98</b> |
|            | <b>PA0074-C</b> | <b>0.97</b> |
|            | <b>PA0075-C</b> | <b>0.97</b> |

|        |                 |             |
|--------|-----------------|-------------|
|        | <b>PA0078-C</b> | <b>0.96</b> |
|        | <b>PA0081-C</b> | <b>0.97</b> |
|        | PA0084-C        | 0.64        |
|        | PA0085-C        | 0.78        |
|        | <b>PA0091-C</b> | <b>0.95</b> |
|        | PA0092-C        | 0.91        |
|        | <b>PA0093-C</b> | <b>0.97</b> |
|        | <b>PA0097-C</b> | <b>0.95</b> |
|        | PA0098-C        | 0.89        |
|        | <b>PA0099-C</b> | <b>0.98</b> |
|        | <b>PA0100-C</b> | <b>0.96</b> |
|        | <b>PA0101-C</b> | <b>0.97</b> |
|        | <b>PA0102-C</b> | <b>0.96</b> |
| Guinea | <b>PA0134-C</b> | <b>0.95</b> |
|        | <b>PA0137-C</b> | <b>0.99</b> |
|        | PA0138-C        | 0.22        |
|        | PA0140-C        | NA          |
|        | <b>PA0144-C</b> | <b>0.99</b> |
|        | PA0145-C        | 0.52        |
|        | PA0146-C        | 0.41        |
|        | PA0147-C        | 0.37        |
|        | PA0148-C        | 0.86        |
|        | <b>PA0149-C</b> | <b>1.00</b> |
|        | <b>PA0151-C</b> | <b>0.99</b> |
|        | <b>PA0152-C</b> | <b>0.99</b> |
|        | PA0153-C        | 0.72        |
|        | PA0155-C        | 0.41        |
|        | <b>PA0157-C</b> | <b>0.99</b> |
|        | <b>PA0158-C</b> | <b>0.99</b> |
|        | <b>PA0159-C</b> | <b>0.99</b> |
|        | PA0160-C        | 0.41        |
|        | <b>PA0161-C</b> | <b>1.00</b> |
|        | PA0163-C        | 0.63        |
|        | <b>PA0165-C</b> | <b>0.99</b> |
|        | <b>PA0167-C</b> | <b>1.00</b> |
|        | <b>PA0168-C</b> | <b>0.99</b> |
|        | <b>PA0169-C</b> | <b>1.00</b> |
|        | PA0171-C        | 0.73        |
|        | <b>PA0172-C</b> | <b>0.99</b> |
|        | <b>PA0173-C</b> | <b>0.97</b> |
|        | <b>PA0176-C</b> | <b>0.99</b> |
|        | PA0177-C        | 0.85        |
|        | PA0178-C        | 0.80        |
|        | PA0179-C        | 0.61        |

|  |                 |             |
|--|-----------------|-------------|
|  | <b>PA0180-C</b> | <b>1.00</b> |
|  | <b>PA0182-C</b> | <b>1.00</b> |
|  | <b>PA0183-C</b> | <b>0.99</b> |
|  | <b>PA0184-C</b> | <b>0.97</b> |
|  | PA0185-C        | 0.85        |
|  | <b>PA0186-C</b> | <b>1.00</b> |
|  | <b>PA0187-C</b> | <b>0.97</b> |
|  | <b>PA0188-C</b> | <b>0.97</b> |
|  | <b>PA0189-C</b> | <b>0.99</b> |
|  | <b>PA0190-C</b> | <b>0.99</b> |
|  | PA0191-C        | 0.48        |
|  | PA0193-C        | 0.80        |
|  | <b>PA0195-C</b> | <b>0.99</b> |
|  | <b>PA0197-C</b> | <b>1.00</b> |
|  | PA0198-C        | 0.86        |
|  | PA0199-C        | 0.86        |
|  | <b>PA0200-C</b> | <b>0.99</b> |
|  | <b>PA0201-C</b> | <b>0.99</b> |
|  | <b>PA0202-C</b> | <b>0.99</b> |
|  | <b>PA0203-C</b> | <b>0.99</b> |
|  | <b>PA0204-C</b> | <b>1.00</b> |
|  | <b>PA0205-C</b> | <b>1.00</b> |
|  | PA0206-C        | 0.80        |
|  | <b>PA0207-C</b> | <b>0.99</b> |
|  | <b>PA0208-C</b> | <b>0.99</b> |
|  | PA0209-C        | 0.84        |
|  | PA0210-C        | 0.43        |
|  | <b>PA0211-C</b> | <b>0.99</b> |
|  | PA0212-C        | 0.71        |
|  | PA0213-C        | 0.89        |
|  | PA0214-C        | 0.89        |
|  | <b>PA0215-C</b> | <b>0.99</b> |
|  | PA0216-C        | 0.82        |
|  | PA0217-C        | 0.66        |
|  | PA0218-C        | 0.63        |
|  | <b>PA0219-C</b> | <b>1.00</b> |
|  | PA0220-C        | 0.52        |
|  | <b>PA0221-C</b> | <b>0.99</b> |
|  | PA0222-C        | 0.25        |
|  | <b>PA0223-C</b> | <b>1.00</b> |
|  | PA0224-C        | 0.39        |
|  | <b>PA0225-C</b> | <b>0.99</b> |
|  | PA0227-C        | 0.52        |
|  | PA0228-C        | 0.48        |

|  |                 |             |
|--|-----------------|-------------|
|  | <b>PA0229-C</b> | <b>0.99</b> |
|  | PA0230-C        | 0.36        |
|  | PA0231-C        | 0.25        |
|  | <b>PA0232-C</b> | <b>0.99</b> |
|  | PA0233-C        | 0.18        |
|  | PA0234-C        | 0.36        |
|  | <b>PA0237-C</b> | <b>0.99</b> |
|  | PA0239-C        | 0.26        |
|  | PA0243-C        | 0.34        |
|  | <b>PA0245-C</b> | <b>0.99</b> |
|  | PA0246-C        | 0.84        |
|  | PA0249-C        | 0.33        |
|  | PA0251-C        | 0.82        |
|  | PA0253-C        | 0.39        |
|  | <b>PA0254-C</b> | <b>1.00</b> |
|  | PA0255-C        | NA          |
|  | <b>PA0256-C</b> | <b>0.99</b> |
|  | PA0257-C        | 0.26        |
|  | <b>PA0260-C</b> | <b>0.97</b> |
|  | PA0261-C        | NA          |
|  | <b>PA0262-C</b> | <b>0.99</b> |
|  | PA0263-C        | 0.53        |
|  | PA0267-C        | NA          |
|  | PA0269-C        | 0.77        |
|  | <b>PA0270-C</b> | <b>0.99</b> |

**Supplementary Table S3.** Tajima's D values genome-wide for all genes with 3 or more SNPs in Guinea or Gambia. (Large EXCEL file given separately)



**Supplementary Table S4A.** Gene ontology terms significantly enriched amongst genes with a Tajima's D value of > 1.

| GO ID                       | Term                 | Annotated | Significant | Expected | p-value              |
|-----------------------------|----------------------|-----------|-------------|----------|----------------------|
| <b>Molecular function</b>   |                      |           |             |          |                      |
| <b>Guinea</b>               |                      |           |             |          |                      |
| GO:0004872                  | receptor activity    | 24        | 3           | 0.15     | 3.5x10 <sup>-4</sup> |
| <b>Gambia</b>               |                      |           |             |          |                      |
| GO:0004872                  | receptor activity    | 24        | 4           | 0.25     | 7.8x10 <sup>-5</sup> |
| <b>Biological process</b>   |                      |           |             |          |                      |
| <b>Guinea</b>               |                      |           |             |          |                      |
| GO:0009405                  | pathogenesis         | 17        | 4           | 0.14     | 5.7x10 <sup>-6</sup> |
| <b>Gambia</b>               |                      |           |             |          |                      |
| GO:0009405                  | pathogenesis         | 17        | 5           | 0.25     | 2.2x10 <sup>-6</sup> |
| <b>Cellular compartment</b> |                      |           |             |          |                      |
| <b>Gambia</b>               |                      |           |             |          |                      |
| GO:0016021                  | integral to membrane | 288       | 10          | 4        | 3.9x10 <sup>-3</sup> |

All terms that were highly significantly enriched ( $p < 0.001$ ) are shown for both populations. The total number of genes used in the analysis annotated with each term is shown along with the number of these genes that were significant (Tajima's D scores > 1). The number of genes expected to be significant given a random distribution is also shown. P-values calculated by Fisher's exact test and adjusted to account for the GO graph structure (Alexa et al 2006).

**Supplementary Table S4B.** Genes contributing to significantly enriched GO terms.

| GO ID      | Term                    | Gene ID       | Product                                                          | Tajima's D<br>Guinea | Tajima's D<br>Gambia |
|------------|-------------------------|---------------|------------------------------------------------------------------|----------------------|----------------------|
| GO:0004872 | receptor<br>activity    | PF3D7_0113800 | DBL containing<br>protein, unknown<br>function                   | 1.36                 | 1.15                 |
|            |                         | PF3D7_0731500 | erythrocyte binding<br>antigen-175<br>(EBA175)                   | 0.58                 | 1.22                 |
|            |                         | PF3D7_1035700 | duffy binding-like<br>merozoite surface<br>protein (DBLMSP)      | 1.33                 | 2.48                 |
|            |                         | PF3D7_1036300 | merozoite surface<br>protein (DBLMSP2)                           | 2.68                 | 2.50                 |
| GO:0009405 | pathogenesis            | PF3D7_0113800 | DBL containing<br>protein, unknown<br>function                   | 1.36                 | 1.15                 |
|            |                         | PF3D7_0731500 | erythrocyte binding<br>antigen-175<br>(EBA175)                   | 0.58                 | 1.22                 |
|            |                         | PF3D7_1035700 | duffy binding-like<br>merozoite surface<br>protein (DBLMSP)      | 1.33                 | 2.48                 |
|            |                         | PF3D7_1036300 | merozoite surface<br>protein (DBLMSP2)                           | 2.68                 | 2.50                 |
|            |                         | PF3D7_1133400 | apical membrane<br>antigen 1 (AMA1)                              | 1.45                 | 1.70                 |
| GO:0046812 | integral to<br>membrane | PF3D7_0104100 | conserved<br>Plasmodium<br>membrane protein,<br>unknown function | 1.16                 | 1.05                 |
|            |                         | PF3D7_0113800 | DBL containing<br>protein, unknown<br>function                   | 1.36                 | 1.15                 |
|            |                         | PF3D7_0114500 | Plasmodium<br>exported protein<br>(hyp10), unknown<br>function   | 1.04                 | 1.27                 |
|            |                         | PF3D7_0321200 | N-<br>acetylglucosamine-<br>1-phosphate<br>transferase, putative | 1.65                 | 1.68                 |
|            |                         | PF3D7_0501300 | skeleton-binding<br>protein 1 (SBP1)                             | -                    | 1.35                 |
|            |                         | PF3D7_0731500 | erythrocyte binding<br>antigen-175<br>(EBA175)                   | 0.58                 | 1.22                 |
|            |                         | PF3D7_1035700 | duffy binding-like<br>merozoite surface<br>protein (DBLMSP)      | 1.33                 | 2.48                 |
|            |                         | PF3D7_1036300 | merozoite surface<br>protein (DBLMSP2)                           | 2.68                 | 2.50                 |
|            |                         | PF3D7_1133400 | apical membrane<br>antigen 1 (AMA1)                              | 1.45                 | 1.70                 |
|            |                         | PF3D7_1204900 | probable protein,<br>unknown function                            | -1.57                | 1.13                 |

**Supplementary Table S5.** All *P. falciparum* genomic regions with at least 2 SNPs with |iHS| scores of > 3.29 (top 1% of expected distribution) for the Guinea population sample.

| Chromosome | Window start<br>(kb along<br>chromosome) | Window end<br>(kb along<br>chromosome) | Region<br>size (kb) | Number<br>of SNPs | Genes within region                  |
|------------|------------------------------------------|----------------------------------------|---------------------|-------------------|--------------------------------------|
| 1          | 163                                      | 184                                    | 21                  | 4                 | PF3D7_0103600 - PF3D7_0104200        |
| 1          | 529                                      | 534                                    | 5                   | 6                 | PF3D7_0113800 - PF3D7_0113800        |
| 2          | 324                                      | 552                                    | 227                 | 2                 | PF3D7_020800 - PF3D7_0213600         |
| 3          | 142                                      | 216                                    | 74                  | 3                 | PF3D7_0302600 - PF3D7_0304300        |
| 4          | 881                                      | 901                                    | 19                  | 4                 | PF3D7_0419900 - PF3D7_0420000        |
| 4          | 1113                                     | 1131                                   | 19                  | 2                 | PF3D7_0424600 - PF3D7_0425000        |
| <b>5</b>   | <b>808</b>                               | <b>1035</b>                            | <b>227</b>          | <b>3</b>          | <b>PF3D7_0519500 - PF3D7_0524900</b> |
| 6          | 548                                      | 1275                                   | 727                 | 28                | PF3D7_0613500 - PF3D7_0630400        |
| 7          | 198                                      | 338                                    | 140                 | 5                 | PF3D7_0704300 - PF3D7_0707200        |
| <b>7</b>   | <b>339</b>                               | <b>522</b>                             | <b>183</b>          | <b>15</b>         | <b>PF3D7_0707300 - PF3D7_0711700</b> |
| 7          | 524                                      | 666                                    | 142                 | 5                 | PF3D7_0711900 - PF3D7_0714500        |
| 7          | 1346                                     | 1374                                   | 28                  | 2                 | PF3D7_0731300 - PF3D7_0731700        |
| 8          | 491                                      | 597                                    | 106                 | 2                 | PF3D7_0809600 - PF3D7_0811900        |
| 9          | 1126                                     | 1419                                   | 293                 | 16                | PF3D7_0927700 - PF3D7_0935800        |
| 10         | 1208                                     | 1552                                   | 344                 | 18                | PF3D7_1029700 - PF3D7_1038600        |
| 11         | 1270                                     | 1318                                   | 48                  | 4                 | PF3D7_1132800 - PF3D7_1133900        |
| 12         | 694                                      | 1095                                   | 401                 | 10                | PF3D7_1217600 - PF3D7_1227100        |
| 12         | 1454                                     | 2050                                   | 596                 | 7                 | PF3D7_1234800 - PF3D7_1250100        |
| 13         | 93                                       | 193                                    | 101                 | 8                 | PF3D7_1301600 - PF3D7_1303800        |

**Supplementary Table S6.** Linkage disequilibrium between the five high  $F_{ST}$  SNPs on *P. falciparum* chromosome 9. SNPs with significant linkage disequilibrium are highlighted in bold for each population sample.

| SNPs being compared | Guinea       |                |                   | Gambia       |                |                   |
|---------------------|--------------|----------------|-------------------|--------------|----------------|-------------------|
|                     | D'           | R <sup>2</sup> | p value           | D'           | R <sup>2</sup> | p value           |
| 1378602 / 1382170   | <b>0.371</b> | <b>0.074</b>   | <b>0.010</b>      | 0.071        | 0.003          | 0.664             |
| 1378602 / 1383344   | <b>0.375</b> | <b>0.115</b>   | <b>0.002</b>      | 0.432        | 0.119          | 0.066             |
| 1378602 / 1384752   | <b>0.479</b> | <b>0.132</b>   | <b>&lt; 0.001</b> | 0.136        | 0.014          | 0.585             |
| 1378602 / 1393934   | <b>0.859</b> | <b>0.200</b>   | <b>&lt; 0.001</b> | 0.111        | 0.008          | 0.609             |
| 1382170 / 1383344   | <b>0.926</b> | <b>0.564</b>   | <b>&lt; 0.001</b> | <b>1.000</b> | <b>0.308</b>   | <b>0.002</b>      |
| 1382170 / 1384752   | <b>0.657</b> | <b>0.404</b>   | <b>&lt; 0.001</b> | 0.278        | 0.054          | 0.198             |
| 1382170 / 1393934   | <b>0.878</b> | <b>0.390</b>   | <b>&lt; 0.001</b> | <b>0.745</b> | <b>0.492</b>   | <b>&lt; 0.001</b> |
| 1383344 / 1384752   | <b>0.777</b> | <b>0.397</b>   | <b>&lt; 0.001</b> | <b>0.695</b> | <b>0.191</b>   | <b>0.015</b>      |
| 1383344 / 1393934   | <b>1.000</b> | <b>0.333</b>   | <b>&lt; 0.001</b> | <b>0.688</b> | <b>0.164</b>   | <b>0.024</b>      |
| 1384752 / 1393934   | <b>0.877</b> | <b>0.364</b>   | <b>&lt; 0.001</b> | 0.309        | 0.084          | 0.061             |

**Supplementary Table S7**

| <b>Chromosome</b> | <b>End of 3'<br/>subtelomere</b> | <b>Start of 5'<br/>subtelomere</b> |
|-------------------|----------------------------------|------------------------------------|
| 1                 | 91652                            | 565426                             |
| 2                 | 67544                            | 860465                             |
| 3                 | 65507                            | 1015545                            |
| 4                 | 170187                           | 1150295                            |
| 5                 | 47760                            | 1326241                            |
| 6                 | 39780                            | 1329499                            |
| 7                 | 132430                           | 1441012                            |
| 8                 | 58826                            | 1349129                            |
| 9                 | 78873                            | 1474420                            |
| 10                | 61365                            | 1599900                            |
| 11                | 77999                            | 2006704                            |
| 12                | 56804                            | 2190468                            |
| 13                | 66918                            | 2826696                            |
| 14                | 28428                            | 3266072                            |
